# Supplementary material for: Inertial Sensor-to-Segment Calibration for Accurate 3D Joint Angle Calculation for Use in OpenSim
Source: MDPI journal article supplement (doi:10.3390/s22093259), 2022-04-24
Supplement: s1 [file s1]

## Supplementary materials:

Markers and IMUs placement.

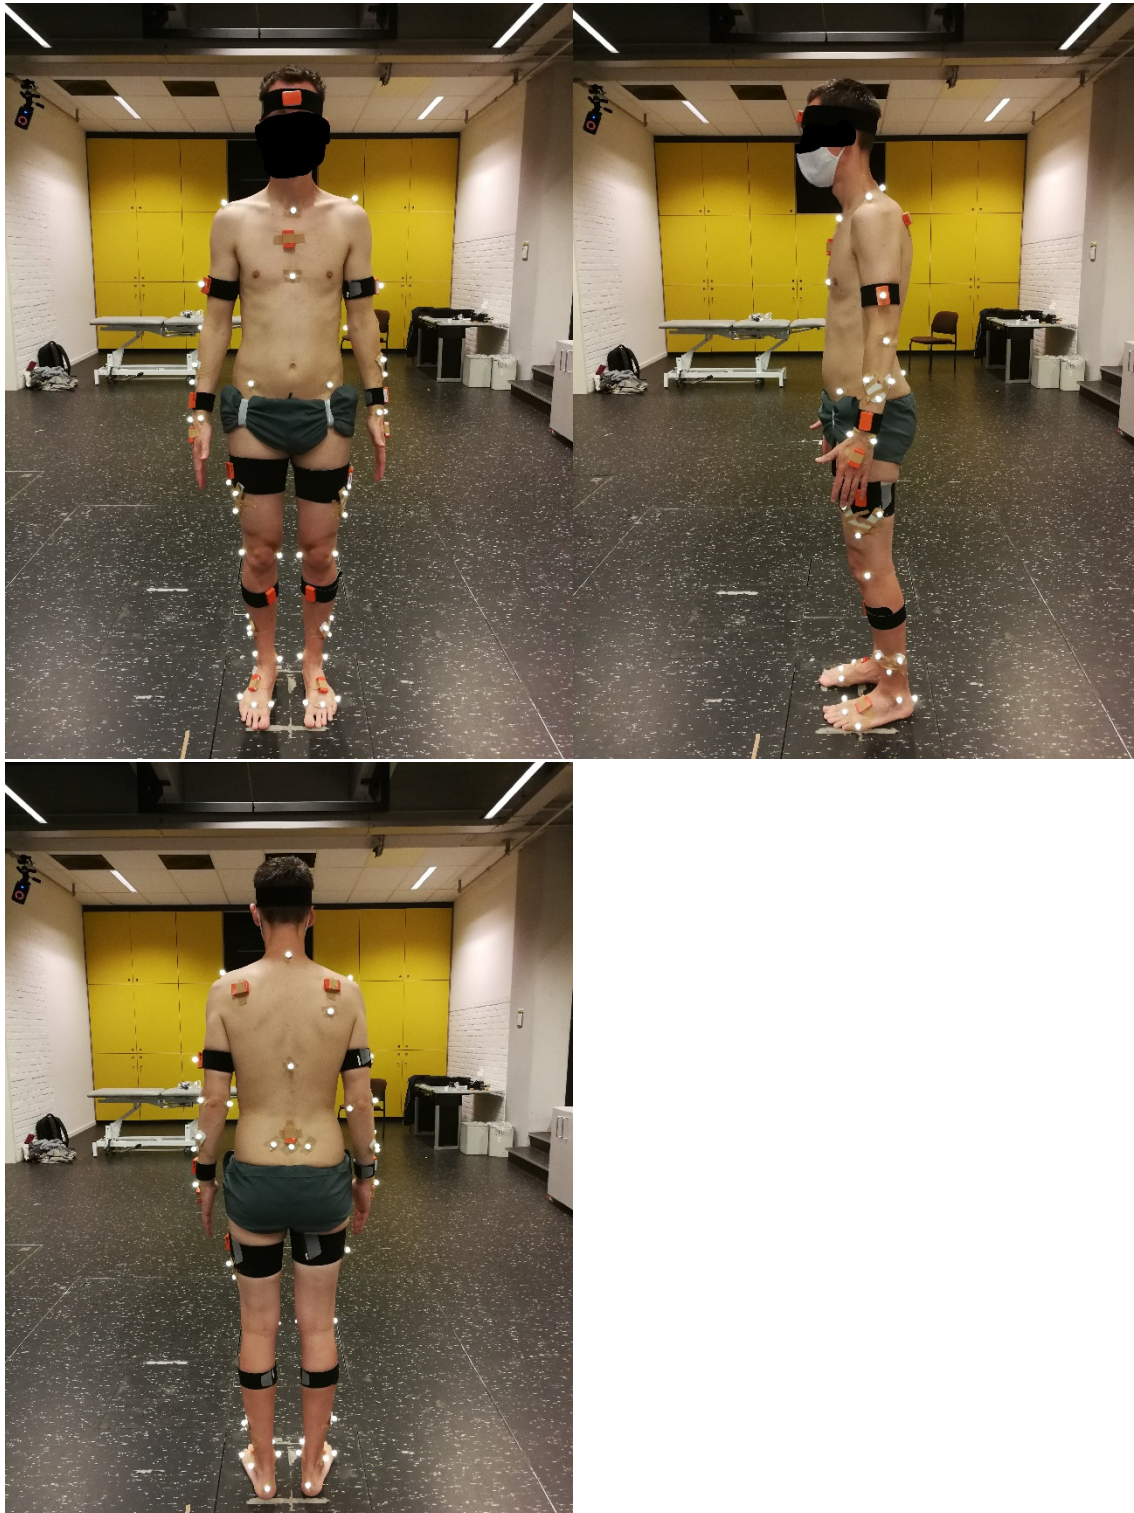

*Figure S1: Markers placement (white bright points) and IMU sensors placement (orange boxes) with straps and tapes.*

Table S1: Marker and sensor names and positions

| MARKERS NAME | POSITION                                                                               |
|--------------|----------------------------------------------------------------------------------------|
| C7           | 7th cervical                                                                           |
| CLAV         | clavicle - in between in the centre                                                    |
| STRN         | sternum - at the end in the centre                                                     |
| T10          | 10th thoracic                                                                          |
| RBAK         | right back - on the right scapula                                                      |
| LSHO         | Left shoulder - at the acromio-clavicular joint                                        |
| LUPA1        | Left upper arm - between shoulder and elbow                                            |
| LELB         | Left elbow - lateral epicondyle                                                        |
| LFRA1        | left forearm - between the elbow and wrist                                             |
| LWRA         | lef wrist A - medial left wrist                                                        |
| LWRB         | left wrist B - lateral left wrist                                                      |
| LFIN         | Left finger - second metacarpal head                                                   |
| RSHO         | right shoulder - at the acromio-clavicular joint                                       |
| RUPA1        | right upper arm - between shoulder and elbow                                           |
| RELB         | right elbow - lateral epicondyle                                                       |
| RFRA1        | right forearm - between the elbow and wrist                                            |
| RWRA         | right wrist A - medial right wrist                                                     |
| RWRB         | right wrist B - lateral right wrist                                                    |
| RFIN         | right fing - second metacarpal head                                                    |
| LASI         | right anterior superior iliac spine                                                    |
| RASI         | left anterior superior iliac spine                                                     |
| RPSI         | right posterior superior iliac spine                                                   |
| LPSI         | left posterior superior iliac spine                                                    |
| LTHI         | left thigh cluster                                                                     |
| LTHI2        | left thigh cluster                                                                     |
| LTH3         | left thigh cluster                                                                     |
| LKNE         | left knee - lateral femoral epicondyle                                                 |
| LKNEmed      | left knee medial - medial femoral epicondyle                                           |
| LTIB         | left tibia cluster                                                                     |
| LTIB2        | left tibia cluster                                                                     |
| LTIB3        | left tibia cluster                                                                     |
| LANK         | left ankle - lateral malleolus                                                         |
| LANKmed      | left ankle - medial malleolus                                                          |
| LHEE         | left hee - on the calcaneus at the same height as the left foot second metatarsal head |
| LTOE         | left toe - second metatarsal head                                                      |
| LLatFoot     | left lateral foot                                                                      |

|          |                                                                                           |
|----------|-------------------------------------------------------------------------------------------|
| RTH1     | right thigh cluster                                                                       |
| RTHI2    | right thigh cluster                                                                       |
| RTH3     | right thigh cluster                                                                       |
| RKNE     | right knee - lateral femoral epicondyle                                                   |
| RKNEmed  | right knee medial - medial femoral epicondyle                                             |
| RTIB     | right tibia cluster                                                                       |
| RTIB2    | right tibia cluster                                                                       |
| RTIB3    | right tibia cluster                                                                       |
| RANK     | right ankle - lateral malleolus                                                           |
| RANKmed  | right ankle - medial malleolus                                                            |
| RHEE     | right heel - on the calcaneus at the same height as the right foot second metatarsal head |
| RTOE     | right toe - second metatarsal head                                                        |
| RLatFoot | right lateral foot                                                                        |

### IMU position

|             |         |                                  |
|-------------|---------|----------------------------------|
| Torso       | HEAD    | On the forehead                  |
|             | STERNUM | On the sternum                   |
|             | PELVIS  | On the sacrum                    |
| Upper Limbs | SHOU    | On the scapula                   |
|             | UARM    | On the humerus                   |
|             | FARM    | On the radio                     |
|             | HAND    | On the back of the hand          |
| Lower Limbs | LLEG    | On the lateral part of the thigh |
|             | ULEG    | On the upper medial shank part   |
|             | FOOT    | On the metatarsal                |

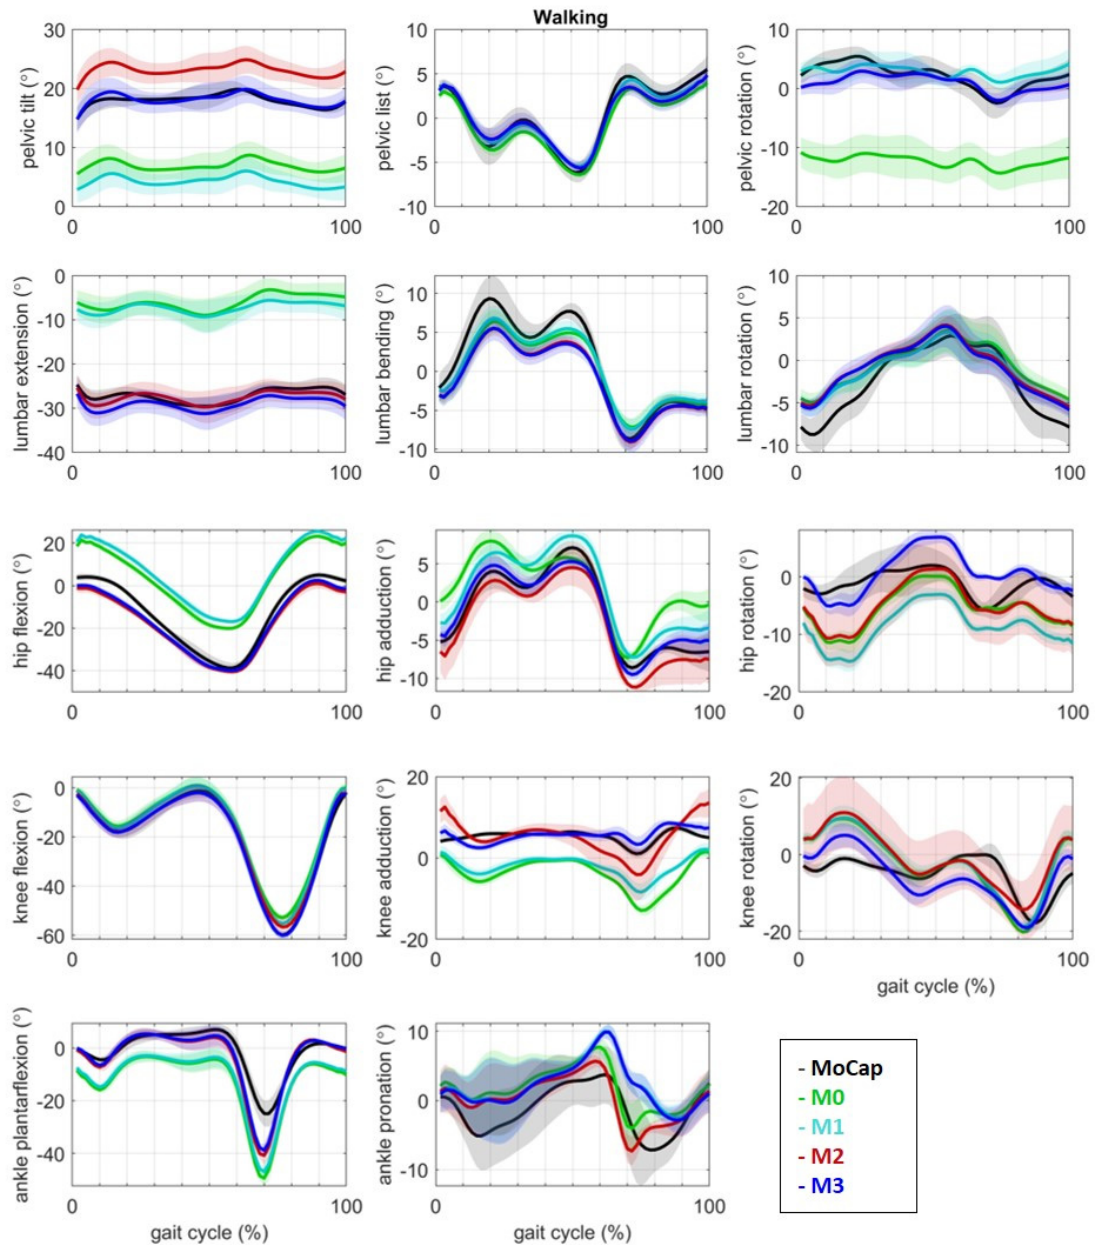

Figure S2: 3D pelvic, lumbar and lower limb joint angles during an over ground walking - gait cycle - with the InCap system over a cycle for a representative subject. InCap system (M0 - green, M1 - cyan, M2 - red, M3 - blue) and MoCap system (black). M0: OpenSense standard pipeline, M1: functional hip abd-adduction motion calibration, M2: functional PCA walking calibration, M3: functional hip abd-adduction and walking PCA calibration



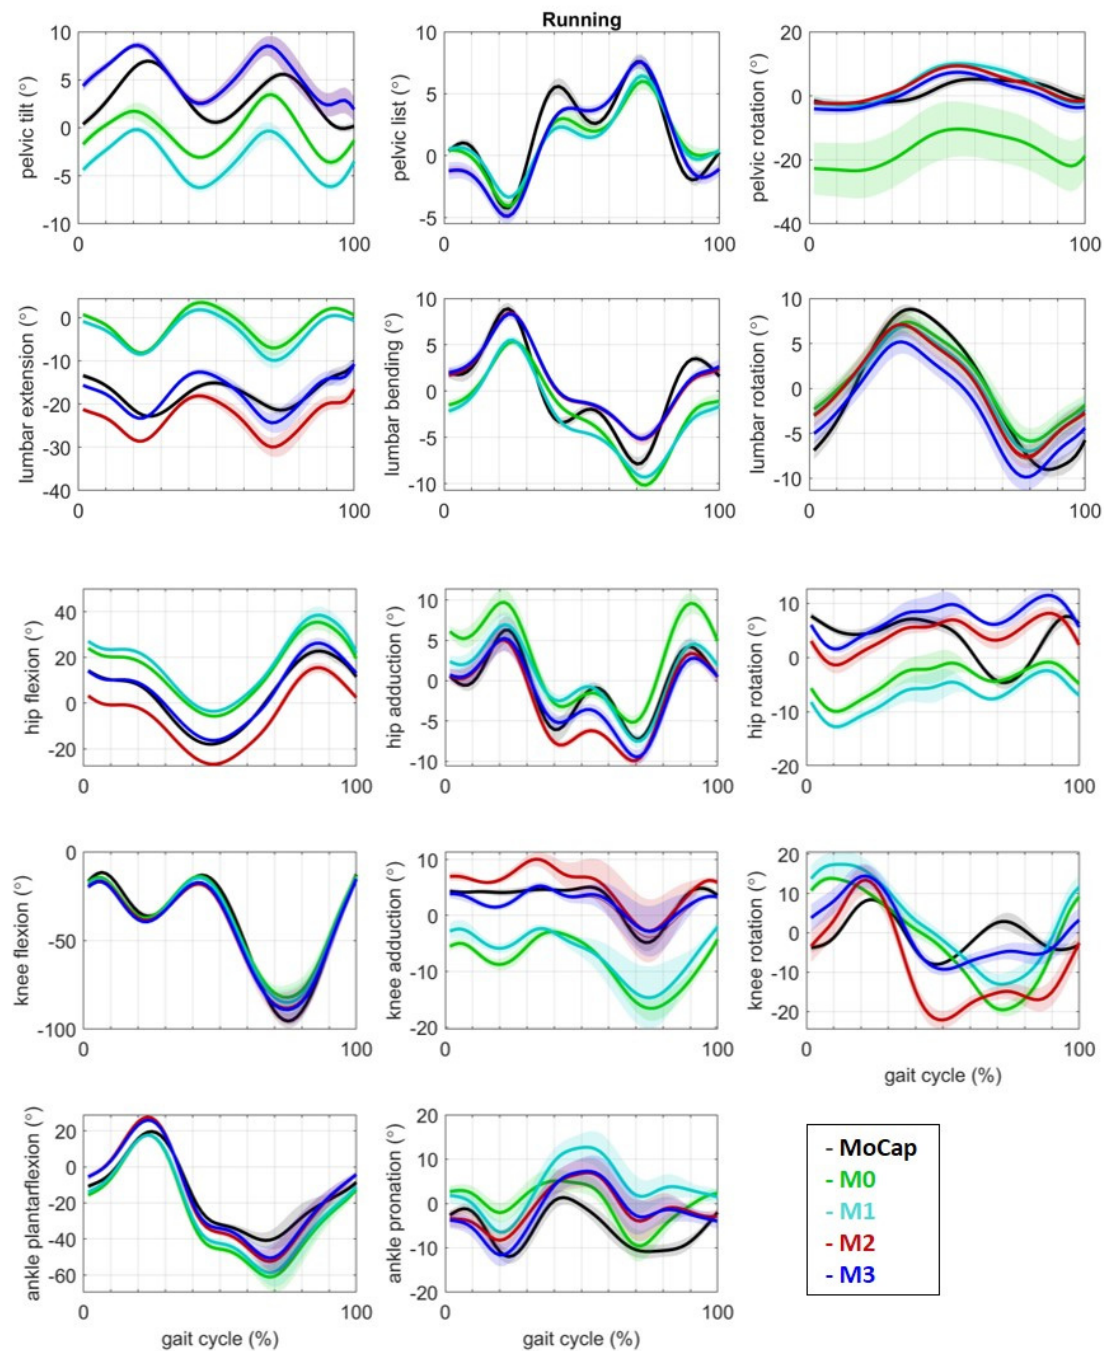

Figure S3: 3D pelvic, lumbar and lower limb joint angles during running - gait cycle - with the InCap system over a cycle for a representative subject. InCap system (M0 - green, M1 - cyan, M2 - red, M3 - blue) and MoCap system (black). M0: OpenSense standard pipeline, M1: functional hip abd-adduction motion calibration, M2: functional PCA walking calibration, M3: functional hip abd-adduction and walking PCA calibration.

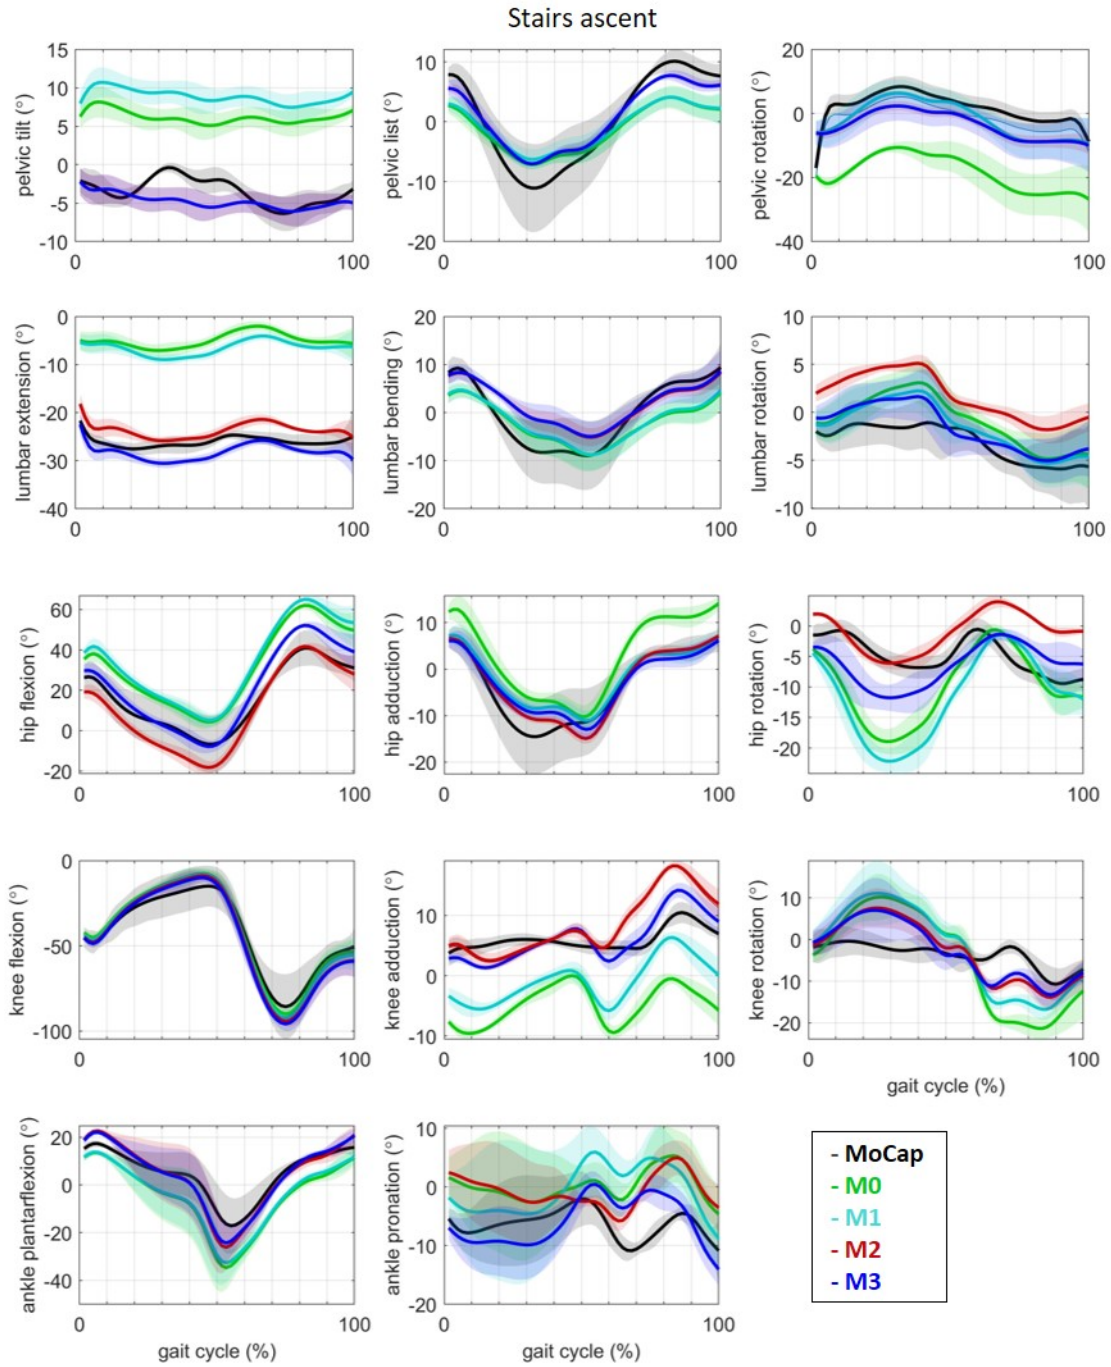

Figure S4: 3D pelvic, lumbar and lower limb joint angles during stairs ascent - gait cycle - with the InCap system over a cycle for a representative subject. InCap system (M0 - green, M1 - cyan, M2 - red, M3 - blue) and MoCap system (black). M0: OpenSense standard pipeline, M1: functional hip abd-adduction motion calibration, M2: functional PCA walking calibration, M3: functional hip abd-adduction and walking PCA calibration.

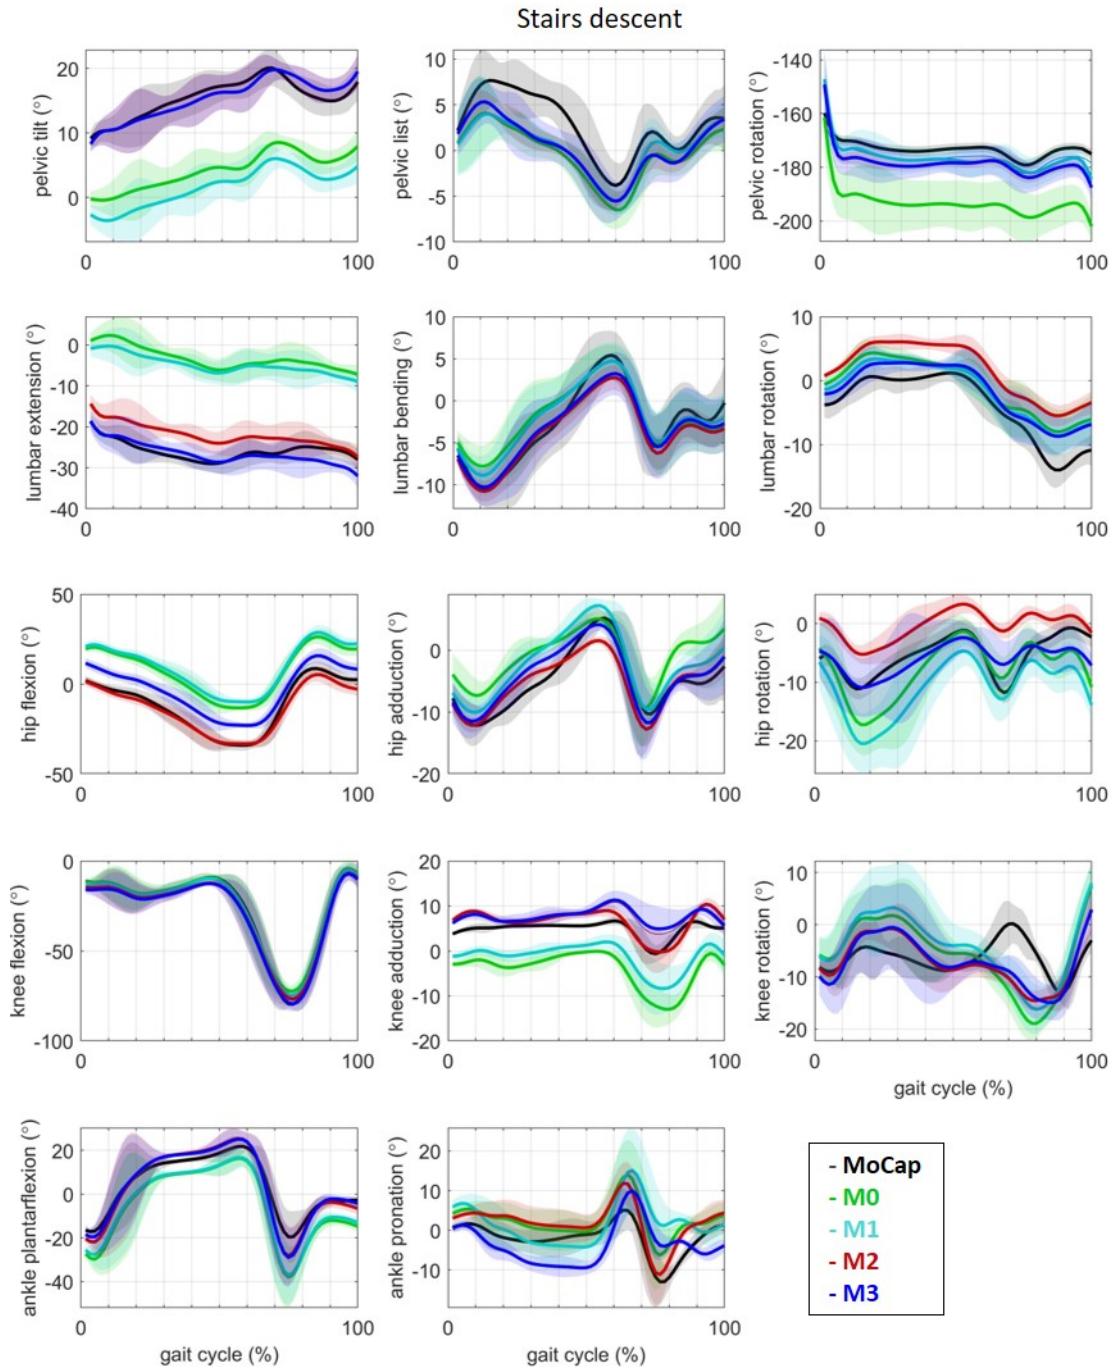

Figure S5: 3D pelvic, lumbar and lower limb joint angles during stairs descent - gait cycle - with the InCap system over a cycle for a representative subject. InCap system (M0 - green, M1 - cyan, M2 - red, M3 - blue) and MoCap system (black). M0: OpenSense standard pipeline, M1: functional hip abd-adduction motion calibration, M2: functional PCA walking calibration, M3: functional hip abd-adduction and walking PCA calibration.



| Walking     |                       | RMSE(°)          |                  |           | R <sup>2</sup> |                  |           | ΔROM(°)   |           |                  | ΔPeak(°)  |           |           |
|-------------|-----------------------|------------------|------------------|-----------|----------------|------------------|-----------|-----------|-----------|------------------|-----------|-----------|-----------|
|             |                       | Method 0         | Method 1         | Method 2  | Method 3       | Method 0         | Method 1  | Method 2  | Method 3  | Method 0         | Method 1  | Method 2  | Method 3  |
|             |                       | Mean (SD)        |                  |           | Mean (SD)      |                  |           | Mean (SD) |           |                  | Mean (SD) |           |           |
|             |                       | Method 0         | Method 1         | Method 2  | Method 3       | Method 0         | Method 1  | Method 2  | Method 3  | Method 0         | Method 1  | Method 2  | Method 3  |
| Pelvic      | Tilt                  | 5.4 (1.8)        | 5.7 (2.1)        | 4.4 (2.6) | 4.4 (1.0)      | 0.5 (0.3)        | 0.5 (0.3) | 0.5 (0.3) | 0.6 (0.3) | 1.2 (2.0)        | 1.3 (2.0) | 1.3 (1.5) | 1.3 (1.5) |
|             | List                  | 3.0 (1.1)        | 2.4 (0.8)        | 3.6 (0.9) | 2.1 (0.8)      | 0.6 (0.3)        | 0.7 (0.3) | 0.6 (0.3) | 0.6 (0.3) | 3.3 (1.4)        | 2.9 (1.4) | 3.2 (1.4) | 3.2 (1.7) |
|             | Rotation              | 23 (8.2)         | 16 (9.1)         | 4.6 (2.0) | 5.3 (2.1)      | 0.6 (0.3)        | 0.6 (0.3) | 0.7 (0.3) | 0.7 (0.3) | 2.8 (1.9)        | 2.7 (1.9) | 2.8 (1.7) | 2.8 (1.7) |
| Lumbar      | Extension             | 8.4 (3.2)        | 10 (4.4)         | 4.4 (4.4) | 3.2 (2.8)      | 0.8 (0.3)        | 0.7 (0.3) | 0.7 (0.3) | 0.7 (0.3) | 2.1 (2.1)        | 1.6 (2.3) | 1.5 (2.1) | 1.4 (2.2) |
|             | Bending               | 4.2 (0.9)        | 3.0 (0.8)        | 2.7 (0.9) | 3.5 (0.9)      | 0.7 (0.3)        | 0.7 (0.3) | 0.8 (0.3) | 0.8 (0.3) | 3.2 (5.8)        | 2.8 (5.9) | 2.9 (4.5) | 2.9 (3.9) |
|             | Rotation              | 4.2 (0.9)        | 4.5 (1.4)        | 5.7 (0.8) | 3.3 (0.9)      | 0.9 (0.2)        | 0.8 (0.2) | 0.9 (0.2) | 0.9 (0.2) | 2.7 (2.4)        | 2.5 (2.3) | 3.0 (2.3) | 2.9 (2.1) |
| Hip right   | Flexion/Extension     | 6.7 (3.6)        | 5.4 (3.6)        | 3.2 (2.3) | 2.9 (2.3)      | 0.9 (0.1)        | 0.9 (0.1) | 0.9 (0.1) | 0.9 (0.1) | 3.2 (1.2)        | 1.8 (3.9) | 1.7 (4.0) | 1.7 (3.5) |
|             | Abd/Adduction         | <b>5.9 (1.9)</b> | 4.2 (2.2)        | 5.9 (0.6) | 2.4 (0.9)      | <b>0.8 (0.2)</b> | 0.9 (0.1) | 0.7 (0.2) | 0.8 (0.1) | 1.6 (6.6)        | 2.9 (4.7) | 3.4 (2.4) | 3.4 (2.0) |
|             | Int/External Rotation | 9.1 (5.4)        | 8.0 (3.1)        | 4.6 (1.2) | 3.4 (0.8)      | 0.3 (0.4)        | 0.4 (0.4) | 0.3 (0.4) | 0.6 (0.4) | 3.8 (4.4)        | 3.8 (4.5) | 3.8 (4.7) | 3.2 (3.7) |
| Knee right  | Flexion/Extension     | 7.8 (4.7)        | 4.1 (2.8)        | 2.3 (1.1) | 3.9 (1.5)      | 0.9 (0.1)        | 0.9 (0.1) | 0.9 (0.1) | 0.9 (0.0) | <b>3.9 (1.7)</b> | 0.6 (1.6) | 1.7 (1.5) | 0.5 (0.9) |
|             | Abd/Adduction         | <b>7.4 (2.4)</b> | 2.8 (1.8)        | 6.1 (2.4) | 2.1 (2.4)      | 0.1 (0.4)        | 0.8 (0.5) | 0.2 (0.4) | 0.7 (0.5) | <b>7.7 (5.0)</b> | 3.4 (4.4) | 3.2 (4.2) | 1.9 (2.1) |
|             | Int/External Rotation | <b>8.4 (3.5)</b> | <b>6.3 (2.5)</b> | 4.6 (4.7) | 4.3 (2.0)      | 0.3 (0.5)        | 0.5 (0.5) | 0.4 (0.4) | 0.6 (0.2) | 3.4 (3.5)        | 3.0 (2.5) | 3.4 (1.9) | 2.8 (1.8) |
| Ankle right | Dorsi/Plantarflexion  | 8.3 (4.1)        | 6.5 (4.4)        | 4.0 (1.8) | 4.0 (1.7)      | 0.9 (0.1)        | 0.9 (0.1) | 0.9 (0.1) | 0.9 (0.1) | 4.3 (4.8)        | 6.0 (4.8) | 5.3 (4.2) | 4.1 (2.9) |
|             | Prono/Supination      | 9.2 (5.0)        | 6.7 (5.4)        | 6.2 (4.1) | 5.4 (2.5)      | 0.5 (0.2)        | 0.6 (0.2) | 0.6 (0.2) | 0.6 (0.2) | 8.0 (5.6)        | 2.7 (3.5) | 3.7 (2.1) | 3.2 (1.8) |
|             |                       |                  |                  |           |                |                  |           |           |           | 5.5 (4.5)        | 4.3 (3.2) | 4.3 (2.6) | 4.3 (2.9) |
| Hip left    | Flexion/Extension     | 7.5 (2.5)        | 5.2 (2.8)        | 4.1 (1.7) | 3.6 (1.1)      | 0.9 (0.1)        | 0.9 (0.1) | 0.9 (0.1) | 0.9 (0.1) | 2.9 (5.1)        | 4.4 (4.5) | 3.8 (2.4) | 4.1 (2.5) |
|             | Abd/Adduction         | 5.1 (1.5)        | 3.7 (1.5)        | 4.1 (2.4) | 3.5 (2.2)      | 0.6 (0.3)        | 0.8 (0.2) | 0.8 (0.2) | 0.8 (0.2) | 4.4 (1.4)        | 3.5 (1.9) | 3.8 (2.1) | 4.1 (1.2) |
|             | Int/External Rotation | <b>7.4 (4.4)</b> | 7.0 (4.5)        | 4.9 (2.3) | 3.7 (2.4)      | 0.2 (0.3)        | 0.5 (0.3) | 0.2 (0.3) | 0.5 (0.3) | 4.3 (1.2)        | 5.2 (3.2) | 5.4 (1.1) | 3.4 (3.1) |
| Knee left   | Flexion/Extension     | 5.9 (3.0)        | 3.9 (2.6)        | 2.6 (1.4) | 2.5 (1.1)      | 0.9 (0.1)        | 0.9 (0.1) | 0.9 (0.1) | 0.9 (0.1) | 2.7 (2.6)        | 0.9 (2.0) | 1.4 (2.6) | 1.4 (0.2) |
|             | Abd/Adduction         | <b>6.3 (2.4)</b> | 3.2 (0.9)        | 5.3 (3.1) | 2.9 (2.0)      | 0.4 (0.3)        | 0.4 (0.3) | 0.4 (0.3) | 0.6 (0.2) | 5.4 (3.9)        | 2.8 (2.5) | 6.1 (4.2) | 2.5 (1.3) |
|             | Int/External Rotation | 7.6 (4.1)        | 5.8 (2.8)        | 7.1 (3.4) | 4.7 (1.3)      | 0.2 (0.2)        | 0.3 (0.2) | 0.2 (0.2) | 0.5 (0.2) | 5.2 (4.1)        | 3.9 (4.1) | 4.2 (5.7) | 3.0 (2.8) |
| Ankle left  | Dorsi/Plantarflexion  | 5.1 (2.0)        | 4.5 (1.6)        | 3.1 (1.7) | 3.1 (1.6)      | 0.9 (0.1)        | 0.9 (0.1) | 0.9 (0.1) | 0.9 (0.1) | 3.5 (4.1)        | 6.6 (3.5) | 4.4 (2.8) | 3.5 (2.9) |
|             | Prono/Supination      | 7.0 (4.1)        | 5.2 (2.5)        | 4.4 (3.5) | 4.8 (1.4)      | 0.5 (0.2)        | 0.6 (0.2) | 0.6 (0.2) | 0.6 (0.2) | 5.1 (2.8)        | 3.2 (6.4) | 1.6 (1.6) | 2.5 (1.2) |
|             |                       |                  |                  |           |                |                  |           |           |           | 8.1 (4.0)        | 6.0 (3.8) | 6.3 (2.7) | 5.2 (2.5) |

Table S2: Values between calibration methods and MoCap during walking for joints-planes. RMSE: root mean square error, R<sup>2</sup>: coefficient of determination, ΔROM: absolute difference in range of motion, ΔPeak: absolute difference in max peak, SD: standard deviation. Significant differences p < 0.05 – values in bold.



| Running     |                       | RMSE(°)          |            |           | R <sup>2</sup> |           |           | ΔROM(°)   |           |           | ΔPeak(°)  |           |           |
|-------------|-----------------------|------------------|------------|-----------|----------------|-----------|-----------|-----------|-----------|-----------|-----------|-----------|-----------|
|             |                       | Mean (SD)        |            |           | Mean (SD)      |           |           | Mean (SD) |           |           | Mean (SD) |           |           |
|             |                       | Method 0         | Method 1   | Method 2  | Method 3       | Method 0  | Method 1  | Method 2  | Method 3  | Method 0  | Method 1  | Method 2  | Method 3  |
| Pelvic      | Tilt                  | 5.4 (1.6)        | 6.7 (2.7)  | 3.5 (2.4) | 3.8 (2.6)      | 0.5 (0.3) | 0.5 (0.3) | 0.6 (0.3) | 0.6 (0.3) | 2.4 (1.9) | 2.2 (1.9) | 2.4 (1.9) | 2.2 (1.9) |
|             | List                  | 6.3 (1.9)        | 6.2 (1.0)  | 4.1 (1.4) | 4.4 (1.0)      | 0.5 (0.3) | 0.5 (0.3) | 0.6 (0.3) | 0.6 (0.3) | 1.8 (1.9) | 2.2 (1.9) | 1.3 (1.7) | 1.3 (1.8) |
|             | Rotation              | <b>16 (5.4)</b>  | 6.7 (2.9)  | 4.1 (1.3) | 4.0 (0.6)      | 0.3 (0.2) | 0.5 (0.3) | 0.6 (0.2) | 0.4 (0.2) | 3.8 (1.4) | 4.7 (1.1) | 3.4 (1.0) | 4.0 (1.0) |
| Lumbar      | Extension             | 7.4 (2.4)        | 4.6 (3.7)  | 5.6 (2.4) | 4.9 (2.5)      | 0.8 (0.2) | 0.8 (0.1) | 0.8 (0.1) | 0.8 (0.1) | 3.5 (1.7) | 2.2 (1.9) | 1.8 (1.9) | 2.3 (1.8) |
|             | Bending               | 4.8 (1.2)        | 4.0 (1.1)  | 4.8 (1.2) | 4.4 (1.3)      | 0.5 (0.3) | 0.6 (0.2) | 0.7 (0.2) | 0.7 (0.2) | 5.1 (3.5) | 3.3 (3.7) | 3.8 (3.5) | 4.0 (3.5) |
|             | Rotation              | 4.8 (1.2)        | 5.1 (1.6)  | 5.8 (0.6) | 4.7 (1.2)      | 0.9 (0.3) | 0.9 (0.1) | 0.9 (0.1) | 0.9 (0.1) | 4.4 (2.2) | 4.5 (2.5) | 4.5 (2.6) | 4.5 (2.5) |
| Hip right   | Flexion/Extension     | 7.9 (5.9)        | 4.4 (3.5)  | 4.4 (2.0) | 5.1 (1.8)      | 0.8 (0.4) | 0.9 (0.1) | 0.8 (0.4) | 0.8 (0.4) | 2.5 (0.8) | 2.7 (0.7) | 2.4 (0.8) | 1.2 (0.5) |
|             | Abd/Adduction         | 7.2 (5.2)        | 4.4 (2.5)  | 3.9 (0.6) | 2.4 (1.6)      | 0.5 (0.5) | 0.8 (0.5) | 0.6 (0.4) | 0.8 (0.2) | 6.6 (1.5) | 1.6 (1.6) | 3.5 (1.6) | 3.5 (1.6) |
|             | Int/External Rotation | 9.1 (5.0)        | 5.1 (1.7)  | 5.2 (1.7) | 4.0 (1.7)      | 0.2 (0.5) | 0.2 (0.4) | 0.5 (0.5) | 0.6 (0.5) | 4.5 (1.5) | 5.1 (1.4) | 4.9 (1.4) | 4.6 (1.7) |
| Knee right  | Flexion/Extension     | <b>9.8 (4.0)</b> | 4.2 (1.9)  | 4.6 (2.0) | 3.5 (3.0)      | 0.7 (0.6) | 0.9 (0.1) | 0.7 (0.6) | 0.9 (0.1) | 4.8 (2.1) | 4.7 (1.9) | 5.1 (1.7) | 4.9 (2.1) |
|             | Abd/Adduction         | <b>8.7 (4.5)</b> | 4.7 (3.3)  | 6.0 (4.9) | 5.6 (2.7)      | 0.2 (0.6) | 0.8 (0.5) | 0.3 (0.5) | 0.7 (0.5) | 5.4 (3.3) | 1.5 (1.0) | 3.6 (1.0) | 2.9 (1.2) |
|             | Int/External Rotation | 9.5 (4.9)        | 7.1 (6.0)  | 6.7 (5.0) | 4.8 (3.1)      | 0.3 (0.6) | 0.4 (0.5) | 0.3 (0.6) | 0.4 (0.5) | 6.3 (1.2) | 5.7 (1.8) | 4.8 (1.8) | 3.5 (3.0) |
| Ankle right | Dorsi/Plantarflexion  | 8.6 (5.9)        | 4.2 (3.3)  | 3.4 (2.1) | 4.2 (2.5)      | 0.7 (0.6) | 0.9 (0.1) | 0.7 (0.6) | 0.9 (0.1) | 7.2 (3.1) | 4.0 (2.5) | 4.1 (1.2) | 4.5 (2.1) |
|             | Prono/Supination      | 10.5 (2.4)       | 9.2 (1.5)  | 5.1 (1.5) | 5.2 (1.1)      | 0.6 (0.1) | 0.8 (0.1) | 0.6 (0.2) | 0.7 (0.3) | 8.3 (3.2) | 2.5 (1.2) | 5.5 (1.2) | 3.1 (1.7) |
| Hip left    | Flexion/Extension     | 6.8 (2.4)        | 11.2 (2.7) | 4.5 (3.8) | 4.6 (2.7)      | 0.9 (0.1) | 0.9 (0.1) | 0.9 (0.1) | 0.9 (0.1) | 2.9 (0.9) | 2.6 (1.1) | 2.9 (1.0) | 3.0 (1.1) |
|             | Abd/Adduction         | 5.9 (1.3)        | 5.6 (0.6)  | 6.4 (1.3) | 4.2 (1.2)      | 0.2 (0.3) | 0.7 (0.3) | 0.8 (0.3) | 0.8 (0.3) | 2.3 (1.4) | 2.3 (1.7) | 2.3 (1.8) | 2.4 (1.8) |
|             | Int/External Rotation | 7.8 (2.5)        | 7.4 (2.1)  | 5.5 (2.5) | 5.0 (1.8)      | 0.2 (0.2) | 0.2 (0.2) | 0.4 (0.2) | 0.5 (0.2) | 4.8 (2.2) | 4.4 (2.2) | 4.4 (3.1) | 4.0 (3.0) |
| Knee left   | Flexion/Extension     | 6.9 (2.1)        | 6.3 (1.7)  | 6.6 (2.4) | 4.9 (1.8)      | 0.9 (0.1) | 0.9 (0.1) | 0.9 (0.1) | 0.9 (0.1) | 4.9 (3.0) | 3.0 (2.2) | 5.2 (3.0) | 3.7 (2.2) |
|             | Abd/Adduction         | <b>9.3 (2.1)</b> | 6.2 (1.0)  | 4.2 (1.2) | 4.1 (1.7)      | 0.4 (0.3) | 0.3 (0.3) | 0.5 (0.3) | 0.5 (0.2) | 9.2 (4.3) | 5.8 (2.8) | 4.2 (3.1) | 4.1 (1.2) |
|             | Int/External Rotation | 8.2 (2.3)        | 6.3 (2.5)  | 6.0 (2.7) | 4.8 (1.5)      | 0.3 (0.3) | 0.4 (0.2) | 0.3 (0.3) | 0.5 (0.2) | 5.4 (3.5) | 4.8 (2.9) | 6.3 (3.3) | 4.7 (1.6) |
| Ankle left  | Dorsi/Plantarflexion  | 4.9 (1.5)        | 4.9 (0.9)  | 4.6 (1.4) | 4.8 (1.4)      | 0.9 (0.1) | 0.9 (0.1) | 0.9 (0.1) | 0.9 (0.1) | 9.3 (2.6) | 7.9 (3.4) | 7.9 (2.8) | 5.4 (2.7) |
|             | Prono/Supination      | 8.2 (2.1)        | 5.8 (2.0)  | 8.8 (2.5) | 6.1 (1.9)      | 0.4 (0.3) | 0.4 (0.3) | 0.3 (0.3) | 0.5 (0.2) | 4.8 (0.9) | 5.9 (1.7) | 4.0 (3.2) | 2.9 (2.6) |

Table S3: Values between calibration methods and MoCap during **running** for joints-planes. RMSE: root mean square error, R<sup>2</sup>: coefficient of determination, ΔROM: absolute difference in range of motion, ΔPeak: absolute difference in max peak, SD: standard deviation. Significant differences p < 0.05 – values in bold.

| Stairs ascent | RMSE(°)               |                   |                  | R <sup>2</sup> |           |           | ΔROM(°)   |           |            | ΔPeak(°)  |           |           |
|---------------|-----------------------|-------------------|------------------|----------------|-----------|-----------|-----------|-----------|------------|-----------|-----------|-----------|
|               | Method 0              | Method 1          | Method 2         | Method 3       | Method 0  | Method 1  | Method 2  | Method 3  | Method 0   | Method 1  | Method 2  | Method 3  |
|               | Mean (SD)             |                   |                  | Mean (SD)      |           |           | Mean (SD) |           |            | Mean (SD) |           |           |
|               | Method 0              | Method 1          | Method 2         | Method 3       | Method 0  | Method 1  | Method 2  | Method 3  | Method 0   | Method 1  | Method 2  | Method 3  |
| Pelvic        | Tilt                  | 8.4 (2.5)         | 8.4 (3.3)        | 7.3 (2.7)      | 7.2 (3.1) | 0.7 (0.3) | 0.7 (0.3) | 0.7 (0.3) | 2.7 (0.8)  | 2.7 (0.9) | 2.1 (0.9) | 2.1 (0.9) |
|               | List                  | 9.3 (2.7)         | 8.8 (2.7)        | 8.0 (2.9)      | 6.8 (2.9) | 0.9 (0.3) | 0.8 (0.3) | 0.9 (0.3) | 4.8 (1.9)  | 4.2 (1.9) | 4.3 (1.7) | 4.3 (1.8) |
|               | Rotation              | 5.5 (3.0)         | 6.8 (2.6)        | 5.6 (3.0)      | 5.6 (3.0) | 0.4 (0.3) | 0.4 (0.3) | 0.5 (0.3) | 4.8 (1.4)  | 5.7 (1.6) | 4.4 (1.5) | 5.9 (1.0) |
| Lumbar        | Extension             | 6.9 (3.0)         | 11 (4.7)         | 4.2 (3.4)      | 4.0 (3.4) | 0.4 (0.2) | 0.6 (0.2) | 0.6 (0.2) | 2.5 (0.7)  | 2.1 (0.7) | 2.4 (0.7) | 1.9 (0.8) |
|               | Bending               | 5.5 (1.7)         | 3.9 (1.2)        | 4.7 (1.2)      | 4.3 (1.2) | 0.4 (0.4) | 0.7 (0.3) | 0.8 (0.3) | 5.6 (3.8)  | 5.0 (3.6) | 3.0 (3.5) | 4.2 (3.6) |
|               | Rotation              | 9.5 (3.2)         | 10 (3.3)         | 3.5 (3.3)      | 3.4 (3.4) | 0.7 (0.3) | 0.7 (0.3) | 0.8 (0.3) | 2.8 (1.8)  | 2.1 (1.8) | 2.3 (1.6) | 2.5 (1.5) |
| Hip right     | Flexion/Extension     | 7.9 (4.9)         | 5.4 (2.5)        | 2.4 (3.0)      | 2.1 (1.8) | 0.9 (0.1) | 0.9 (0.1) | 0.9 (0.1) | 3.5 (1.8)  | 2.7 (1.7) | 3.4 (1.8) | 3.2 (1.5) |
|               | Abd/Adduction         | <b>9.2 (4.2)</b>  | <b>9.8 (2.4)</b> | 6.1 (1.6)      | 2.4 (1.9) | 0.5 (0.5) | 0.8 (0.2) | 0.8 (0.2) | 5.6 (2.5)  | 3.6 (1.6) | 2.5 (2.6) | 4.5 (1.6) |
|               | Int/External Rotation | 9.7 (3.0)         | 4.1 (3.7)        | 2.2 (3.7)      | 4.0 (2.7) | 0.4 (0.5) | 0.7 (0.3) | 0.4 (0.4) | 4.5 (1.4)  | 5.1 (1.3) | 4.7 (1.8) | 4.8 (1.8) |
| Knee right    | Flexion/Extension     | 7.8 (5.0)         | 4.2 (2.9)        | 4.6 (3.0)      | 3.5 (2.0) | 0.9 (0.1) | 0.9 (0.1) | 0.9 (0.1) | 7.0 (2.1)  | 5.5 (2.6) | 5.3 (2.5) | 5.1 (1.8) |
|               | Abd/Adduction         | <b>9.7 (4.5)</b>  | 4.4 (2.3)        | 4.0 (2.4)      | 3.6 (2.1) | 0.2 (0.5) | 0.3 (0.3) | 0.2 (0.5) | 6.4 (3.3)  | 5.5 (1.0) | 6.6 (1.0) | 5.9 (1.2) |
|               | Int/External Rotation | 9.0 (3.9)         | 5.1 (3.0)        | 6.2 (2.0)      | 4.8 (3.1) | 0.6 (0.4) | 0.2 (0.3) | 0.4 (0.4) | 5.3 (1.2)  | 5.9 (1.8) | 2.8 (1.8) | 2.5 (1.4) |
| Ankle right   | Dorsi/Plantarflexion  | 6.6 (2.9)         | 6.2 (3.3)        | 4.4 (4.1)      | 4.2 (2.5) | 0.9 (0.1) | 0.9 (0.1) | 0.9 (0.1) | 7.4 (3.1)  | 4.0 (2.5) | 4.1 (1.2) | 4.3 (2.5) |
|               | Prono/Supination      | 10.5 (2.4)        | 9.2 (1.5)        | 5.1 (1.5)      | 5.2 (1.1) | 0.6 (0.1) | 0.8 (0.1) | 0.6 (0.2) | 8.2 (3.2)  | 2.7 (1.2) | 2.5 (1.2) | 2.3 (1.7) |
| Hip left      | Flexion/Extension     | 5.5 (2.7)         | 4.6 (3.5)        | 4.6 (3.2)      | 4.6 (2.7) | 0.9 (0.1) | 0.9 (0.1) | 0.9 (0.1) | 2.9 (0.9)  | 2.6 (1.1) | 2.9 (1.0) | 3.0 (1.1) |
|               | Abd/Adduction         | 7.2 (1.3)         | 4.8 (0.6)        | 7.1 (1.8)      | 4.2 (1.8) | 0.8 (0.3) | 0.8 (0.3) | 0.7 (0.4) | 2.3 (1.4)  | 2.3 (1.7) | 2.3 (1.8) | 2.4 (1.8) |
|               | Int/External Rotation | <b>9.3 (2.2)</b>  | 4.5 (2.2)        | 5.4 (3.1)      | 5.0 (1.5) | 6.6 (2.4) | 5.4 (2.6) | 7.8 (2.5) | 4.6 (1.2)  | 4.6 (1.3) | 4.0 (1.8) | 4.9 (1.6) |
| Knee left     | Flexion/Extension     | 7.3 (2.1)         | 6.4 (1.3)        | 6.9 (2.0)      | 5.0 (1.6) | 0.9 (0.1) | 0.9 (0.1) | 0.9 (0.1) | 4.3 (4.0)  | 5.0 (2.6) | 3.9 (2.0) | 4.7 (2.1) |
|               | Abd/Adduction         | <b>11.3 (1.1)</b> | 4.2 (1.6)        | 6.5 (1.2)      | 4.5 (1.8) | 0.4 (0.3) | 0.4 (0.3) | 0.5 (0.3) | 10.5 (1.3) | 5.4 (2.9) | 3.5 (2.1) | 5.1 (1.2) |
|               | Int/External Rotation | <b>11.6 (2.3)</b> | 7.3 (1.5)        | 5.8 (2.9)      | 4.9 (1.9) | 0.1 (0.3) | 0.4 (0.3) | 0.4 (0.3) | 5.5 (3.0)  | 3.7 (1.5) | 5.7 (2.2) | 5.7 (2.2) |
| Ankle left    | Dorsi/Plantarflexion  | 6.9 (1.5)         | 5.2 (0.9)        | 4.6 (2.4)      | 4.8 (1.9) | 0.9 (0.1) | 0.9 (0.2) | 0.9 (0.1) | 7.2 (2.6)  | 4.8 (3.4) | 6.3 (2.8) | 5.6 (2.7) |
|               | Prono/Supination      | 8.2 (2.1)         | 5.8 (2.0)        | 8.8 (2.5)      | 6.1 (1.9) | 0.2 (0.3) | 0.2 (0.4) | 0.3 (0.1) | 5.8 (0.9)  | 5.4 (1.7) | 5.6 (3.2) | 4.9 (2.6) |
|               |                       |                   |                  |                |           |           |           |           | 6.1 (3.0)  | 4.9 (3.1) | 4.9 (1.8) | 4.8 (2.0) |
|               |                       |                   |                  |                |           |           |           |           | 6.9 (2.6)  | 4.8 (2.6) | 7.7 (2.2) | 6.0 (1.2) |

Table S4: Values between calibration methods and MoCap during stairs ascent for joints-planes. RMSE: root mean square error, R<sup>2</sup>: coefficient of determination, ΔROM: absolute difference in range of motion, ΔPeak: absolute difference in max peak, SD: standard deviation. Significant differences  $p < 0.05$  – values in bold.

| Stairs descent |                       | RMSE(°)          |                  |            | R <sup>2</sup> |           |           | ΔROM(°)   |           |            | ΔPeak(°)  |            |           |
|----------------|-----------------------|------------------|------------------|------------|----------------|-----------|-----------|-----------|-----------|------------|-----------|------------|-----------|
|                |                       | Method 0         | Method 1         | Method 2   | Method 3       | Method 0  | Method 1  | Method 2  | Method 3  | Method 0   | Method 1  | Method 2   | Method 3  |
|                |                       | Mean (SD)        |                  |            | Mean (SD)      |           |           | Mean (SD) |           |            | Mean (SD) |            |           |
|                |                       | Method 0         | Method 1         | Method 2   | Method 3       | Method 0  | Method 1  | Method 2  | Method 3  | Method 0   | Method 1  | Method 2   | Method 3  |
| Pelvic         | Tilt                  | 11 (4.6)         | 9.8 (3.5)        | 5.9 (7.1)  | 5.9 (5.2)      | 0.5 (0.2) | 0.5 (0.1) | 0.6 (0.2) | 0.6 (0.1) | 2.0 (0.8)  | 1.8 (0.9) | 1.2 (1.9)  | 1.2 (0.9) |
|                | List                  | 4.4 (1.5)        | 3.8 (1.4)        | 2.9 (1.5)  | 2.5 (1.5)      | 0.8 (0.5) | 0.7 (0.5) | 0.8 (0.4) | 0.8 (0.2) | 1.3 (1.1)  | 1.8 (1.1) | 1.5 (1.7)  | 1.8 (1.0) |
|                | Rotation              | 9.1 (2.9)        | 7.4 (3.0)        | 4.0 (3.0)  | 4.0 (3.0)      | 0.8 (0.5) | 0.8 (0.3) | 0.8 (0.3) | 0.8 (0.3) | 4.8 (1.4)  | 5.7 (1.4) | 4.4 (1.5)  | 5.0 (1.0) |
| Lumbar         | Extension             | 6.8 (3.0)        | 10 (4.1)         | 4.4 (3.1)  | 4.4 (2.8)      | 0.7 (0.1) | 0.8 (0.1) | 0.7 (0.3) | 0.8 (0.2) | 4.0 (0.7)  | 2.6 (0.5) | 3.2 (1.7)  | 3.0 (1.8) |
|                | Bending               | 4.1 (1.3)        | 2.7 (0.7)        | 2.2 (1.1)  | 2.7 (0.9)      | 0.7 (0.3) | 0.9 (0.3) | 0.9 (0.3) | 0.9 (0.2) | 3.3 (1.4)  | 3.3 (1.1) | 3.2 (1.5)  | 3.5 (1.1) |
|                | Rotation              | 9.9 (3.2)        | 10 (4.1)         | 3.7 (3.3)  | 3.4 (3.4)      | 0.9 (0.4) | 0.9 (0.3) | 0.9 (0.2) | 0.9 (0.2) | 4.7 (1.4)  | 4.9 (1.8) | 5.2 (1.4)  | 5.1 (1.5) |
| Hip right      | Flexion/Extension     | <b>12 (5.0)</b>  | <b>11 (4.6)</b>  | 4.4 (4.0)  | 4.4 (3.5)      | 0.9 (0.1) | 0.9 (0.1) | 0.9 (0.1) | 0.9 (0.1) | 3.2 (1.4)  | 2.9 (1.7) | 3.1 (1.8)  | 3.1 (1.4) |
|                | Abd/Adduction         | <b>7.2 (2.1)</b> | <b>7.4 (2.5)</b> | 3.9 (2.5)  | 2.4 (3.0)      | 0.7 (0.3) | 0.8 (0.3) | 8.0 (0.2) | 0.8 (0.1) | 3.6 (1.5)  | 2.8 (1.6) | 2.4 (1.6)  | 2.4 (1.6) |
|                | Int/External Rotation | <b>9.1 (5.0)</b> | 8.1 (2.7)        | 6.2 (4.7)  | 4.0 (1.7)      | 0.6 (0.3) | 0.6 (0.4) | 0.7 (0.4) | 0.7 (0.3) | 4.9 (1.4)  | 4.2 (2.3) | 5.6 (1.4)  | 5.5 (1.3) |
| Knee right     | Flexion/Extension     | <b>12 (5.2)</b>  | 13 (4.9)         | 4.6 (1.6)  | 3.5 (3.1)      | 0.9 (0.1) | 0.9 (0.1) | 0.9 (0.1) | 0.9 (0.1) | 6.9 (2.1)  | 3.5 (2.4) | 3.1 (2.5)  | 3.2 (1.8) |
|                | Abd/Adduction         | <b>8.7 (4.0)</b> | 4.2 (2.8)        | 4.0 (1.9)  | 4.6 (2.6)      | 0.3 (0.3) | 0.4 (0.3) | 0.5 (0.3) | 0.5 (0.2) | 4.2 (3.3)  | 3.6 (1.3) | 2.1 (1.7)  | 1.9 (2.7) |
|                | Int/External Rotation | <b>7.5 (2.1)</b> | 5.3 (2.0)        | 8.6 (2.4)  | 5.1 (2.5)      | 0.2 (0.3) | 0.6 (0.3) | 0.4 (0.3) | 0.6 (0.3) | 4.6 (1.5)  | 3.3 (1.8) | 3.6 (1.4)  | 2.3 (2.4) |
| Ankle right    | Dorsi/Plantarflexion  | 12 (3.2)         | 12 (3.6)         | 3.4 (2.1)  | 4.2 (2.6)      | 0.9 (0.1) | 0.9 (0.1) | 0.9 (0.1) | 0.9 (0.1) | 7.3 (3.1)  | 3.8 (2.5) | 5.1 (1.2)  | 5.3 (1.5) |
|                | Prono/Supination      | 10.5 (2.4)       | 9.2 (1.5)        | 5.1 (1.5)  | 5.2 (1.1)      | 0.6 (0.1) | 0.8 (0.1) | 0.6 (0.2) | 0.7 (0.3) | 8.2 (3.2)  | 5.7 (1.4) | 5.5 (1.4)  | 5.3 (1.7) |
|                |                       |                  |                  |            |                |           |           |           |           | 12.0 (1.0) | 8.5 (1.8) | 12.0 (1.4) | 7.2 (1.9) |
| Hip left       | Flexion/Extension     | <b>7.3 (2.1)</b> | <b>9.4 (1.3)</b> | 4.7 (2.0)  | 5.1 (1.6)      | 0.9 (0.1) | 0.9 (0.1) | 0.9 (0.1) | 0.9 (0.1) | 3.0 (0.9)  | 2.4 (1.1) | 2.9 (1.0)  | 2.5 (1.1) |
|                | Abd/Adduction         | 4.9 (1.3)        | 3.5 (0.6)        | 5.1 (1.8)  | 3.7 (1.8)      | 0.4 (0.3) | 0.7 (0.3) | 0.8 (0.3) | 0.7 (0.2) | 3.0 (1.4)  | 2.8 (1.7) | 3.0 (1.8)  | 3.0 (0.9) |
|                | Int/External Rotation | 6.6 (2.2)        | 5.5 (2.2)        | 5.4 (3.1)  | 6.1 (1.5)      | 0.5 (0.3) | 0.5 (0.4) | 0.6 (0.3) | 0.5 (0.3) | 5.0 (2.2)  | 5.5 (2.3) | 5.1 (2.8)  | 5.0 (2.8) |
| Knee left      | Flexion/Extension     | 8.4 (2.2)        | 6.3 (2.1)        | 6.4 (2.5)  | 4.4 (2.4)      | 0.9 (0.1) | 0.9 (0.1) | 0.9 (0.1) | 0.9 (0.1) | 3.6 (4.0)  | 3.9 (2.6) | 2.4 (2.0)  | 2.6 (2.1) |
|                | Abd/Adduction         | <b>9.6 (1.9)</b> | 5.3 (0.6)        | 8.7 (1.8)  | 4.7 (2.2)      | 0.5 (0.3) | 0.2 (0.3) | 0.2 (0.3) | 0.4 (0.3) | 6.8 (2.3)  | 1.7 (2.9) | 4.5 (2.1)  | 5.2 (1.2) |
|                | Int/External Rotation | 11.2 (2.2)       | 8.2 (1.2)        | 11.1 (2.9) | 5.9 (2.9)      | 0.1 (0.3) | 0.6 (0.3) | 0.1 (0.2) | 0.4 (0.2) | 7.7 (3.0)  | 5.5 (2.4) | 5.1 (2.0)  | 4.9 (2.0) |
| Ankle left     | Dorsi/Plantarflexion  | 7.4 (1.5)        | 6.4 (1.0)        | 6.0 (1.4)  | 6.1 (1.1)      | 0.9 (0.1) | 0.9 (0.2) | 0.9 (0.1) | 0.9 (0.1) | 8.4 (2.6)  | 7.3 (2.4) | 6.1 (2.0)  | 5.2 (2.0) |
|                | Prono/Supination      | 9.3 (2.1)        | 6.9 (2.0)        | 9.0 (2.5)  | 7.2 (1.9)      | 0.2 (0.3) | 0.4 (0.4) | 0.2 (0.1) | 0.4 (0.3) | 6.4 (0.9)  | 2.0 (2.7) | 6.0 (3.2)  | 3.9 (2.5) |
|                |                       |                  |                  |            |                |           |           |           |           | 6.5 (2.6)  | 4.4 (2.6) | 7.2 (2.2)  | 5.8 (1.6) |

Table S5: Values between calibration methods and MoCap during stairs descent for joints-planes. RMSE: root mean square error, R<sup>2</sup>: coefficient of determination, ΔROM: absolute difference in range of motion, ΔPeak: absolute difference in max peak, SD: standard deviation. Significant differences  $p < 0.05$  – values in bold.
